# Supplementary material for: Electrochemical sensor for sensitive detection of luteolin based on multi-walled carbon nanotubes/poly(3,4-ethylenedioxythiophene)–gold nanocomposites
Source: Royal Society of Chemistry journal article supplement (doi:10.1039/c9nj05241k), 2020-01-01
Supplement: c9nj05241k1.pdf [file c9nj05241k1.pdf]

## Electronic Supplementary Information

### Electrochemical sensor for sensitive detection of luteolin based on multi-walled carbon nanotubes/poly (3,4-ethylenedioxythiophene)-gold nanocomposites

Wenxue Cheng,<sup>a</sup> Peiyi Zeng,<sup>a</sup> Cenhui Ma,<sup>a</sup> Haoming Peng,<sup>a</sup> Jinsha Yang,<sup>a</sup> Jianzhi Huang,<sup>b</sup> Min Zhang<sup>\*a</sup> and Faliang Cheng<sup>\*a</sup>

a: Guangdong Engineering and Technology Research Center for Advanced Nanomaterials, School of Chemical Engineering and Energy Technology, Dongguan University of Technology, Dongguan 523808, People's Republic of China.

b: School of Chemistry and Chemical Engineering, South China University of Technology, Guangzhou 510641, People's Republic of China.

Tel: +86 769 22862186

\*Corresponding authors.

Prof. Faliang Cheng, E-mail address: [chengfl@dgut.edu.cn](mailto:chengfl@dgut.edu.cn)

Prof. Min Zhang, E-mail address: [mindear@dgut.edu.cn](mailto:mindear@dgut.edu.cn)

New Journal of Chemistry

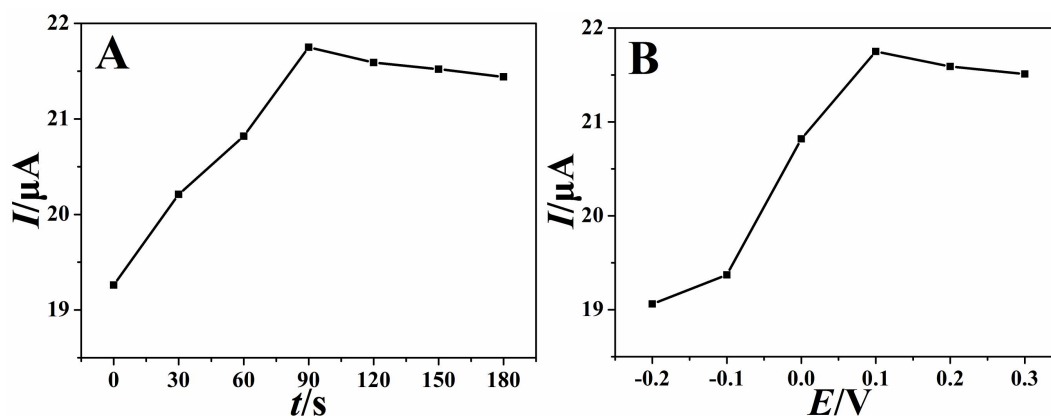

**Fig. S1** The effects of accumulation time (A) and potential (B) for the detection of  $5 \mu\text{mol dm}^{-3}$  luteolin in BR buffer solution at the MWCNTs/PEDT-Au/GCE.

**Table.S1** Effects of possible interferences on the oxidation peak current signal of  $5 \mu\text{mol dm}^{-3}$  luteolin at the MWCNTs/PEDT-Au/GCE in BR buffer solution (pH=3.0).

| Interference                    | Concentration<br>( $\mu\text{mol dm}^{-3}$ ) | Current signal<br>change<br>(%) |
|---------------------------------|----------------------------------------------|---------------------------------|
| CaCl <sub>2</sub>               | 500                                          | -3.02                           |
| K <sub>3</sub> PO <sub>4</sub>  | 500                                          | 1.39                            |
| Na <sub>2</sub> CO <sub>3</sub> | 500                                          | 1.76                            |
| MgSO <sub>4</sub>               | 500                                          | -2.49                           |
| NH <sub>4</sub> F               | 500                                          | 3.40                            |
| Zn(Ac) <sub>2</sub>             | 500                                          | 1.98                            |
| glucose                         | 50                                           | -2.08                           |
| maltose                         | 50                                           | -1.23                           |
| sucrose                         | 50                                           | 3.76                            |
| ascorbic acid                   | 50                                           | -2.84                           |
| dopamine                        | 50                                           | 3.83                            |
| rutin                           | 50                                           | 5.63                            |
| myricitrin                      | 50                                           | 3.85                            |
| diosmetin                       | 50                                           | -2.63                           |
| quercetin                       | 50                                           | 4.05                            |
| curcumin                        | 50                                           | 2.59                            |

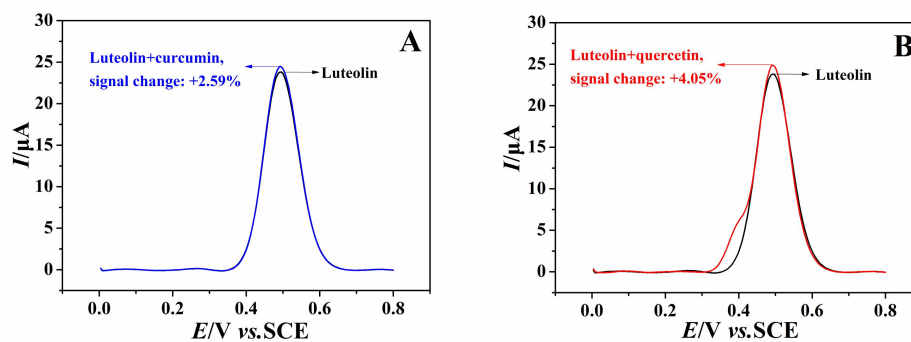

**Fig. S2** The effects of curcumin (A) and quercetin (B) for the detection of  $5 \mu\text{mol dm}^{-3}$  luteolin in BR buffer solution at the MWCNTs/PEDT-Au/GCE.

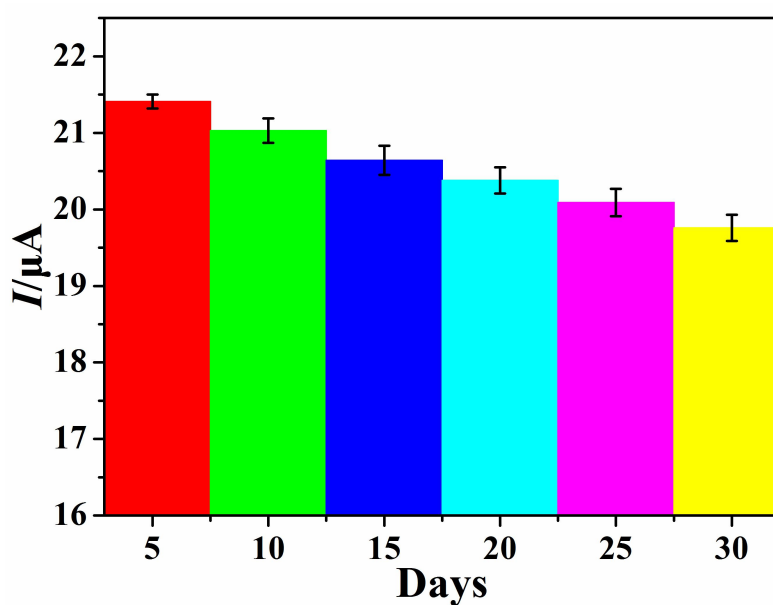

**Fig. S3** The bar diagram of current responses to  $5 \mu\text{mol dm}^{-3}$  luteolin recorded on MWCNTs/PEDT-Au/GCE in BR buffer solution (pH=3.0) after storing during different time periods.

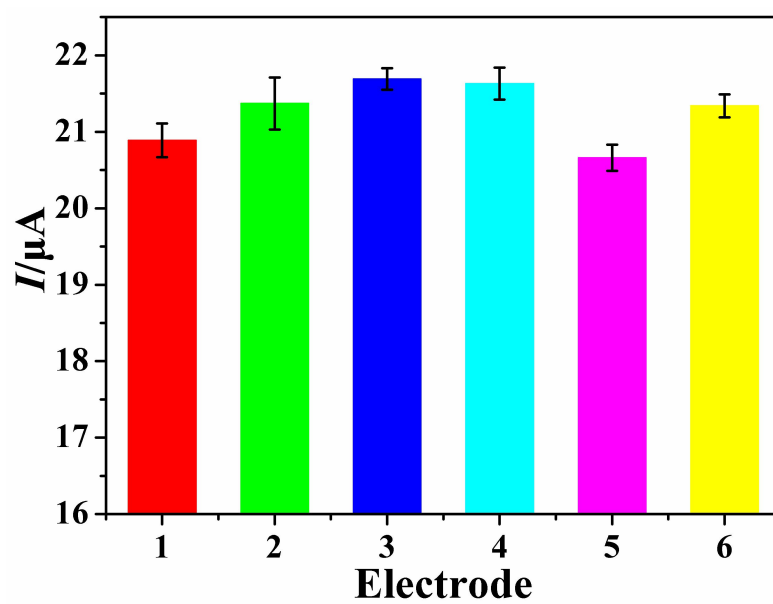

**Fig. S4** SWV responds of the six identically fabricated MWCNTs/PEDT-Au/GCE in BR buffer solution (pH=3.0) containing 5  $\mu\text{mol dm}^{-3}$  luteolin. The error bars represent standard deviations of three measurements.
